# Supplementary material for: Copper vanadates/polyaniline composites as anode materials for lithium-ion batteries
Source: Royal Society of Chemistry journal article supplement (doi:10.1039/c5ra02457a), 2015-01-01
Supplement: c5ra02457a1.pdf [file c5ra02457a1.pdf]

## Supporting Information

### Copper vanadates/polyaniline composites as anode material for lithium-ion batteries

Shaoyan Zhang,<sup>\*a</sup> Shengjie Peng,<sup>b</sup> Ruisheng Hu<sup>a</sup> and Seeram Ramakrishna<sup>b</sup>

<sup>a</sup> College of Chemical Engineering, Shijiazhuang University, Hebei Province, Shijiazhuang, 050035, China.

Tel: +86-311-66617326; E-mail: zsyedu@hotmail.com

<sup>b</sup> Mechanical Engineering, National University of Singapore, Singapore, 117574, Singapore

Figure S1 displays the infrared diffuse reflectance spectra of pure  $\text{Cu}_5(\text{VO}_4)_2(\text{OH})_4 \cdot \text{H}_2\text{O}$  nanorods and  $\text{Cu}_5(\text{VO}_4)_2(\text{OH})_4 \cdot \text{H}_2\text{O}/\text{PANI}$  nanocomposite. For pure  $\text{Cu}_5(\text{VO}_4)_2(\text{OH})_4 \cdot \text{H}_2\text{O}$  nanorods, the characteristic peaks are mainly in the range from  $500 \text{ cm}^{-1}$  to  $1000 \text{ cm}^{-1}$ , including the symmetric and asymmetric stretching vibration peaks of the V–O band and the stretching vibration mode of the V=O band. The strong characteristic peak at  $3331$  and  $1749 \text{ cm}^{-1}$  can be assigned to the symmetric stretching vibration and bending vibration of H–O–H in  $\text{H}_2\text{O}$  molecules, respectively. The weak at  $1552 \text{ cm}^{-1}$  is the vibration of Cu–O bond. All these peaks can also be observed in  $\text{Cu}_5(\text{VO}_4)_2(\text{OH})_4 \cdot \text{H}_2\text{O}/\text{PANI}$  nanocomposite. In this composite, the peaks at  $1558 \text{ cm}^{-1}$  and  $1490 \text{ cm}^{-1}$  are attributed to the C=C stretching of quinonoid rings and C=C stretching of benzenoid rings, respectively. The peak at  $1269 \text{ cm}^{-1}$  corresponds to C–N stretching vibration. The peak at  $1146 \text{ cm}^{-1}$  is attributed to the characteristic of the C–N=C bond stretching. The band at  $1037 \text{ cm}^{-1}$  can be designated as the split peak of C–H plane bending vibration, indicating the strong interaction between the organic shell and inorganic core.

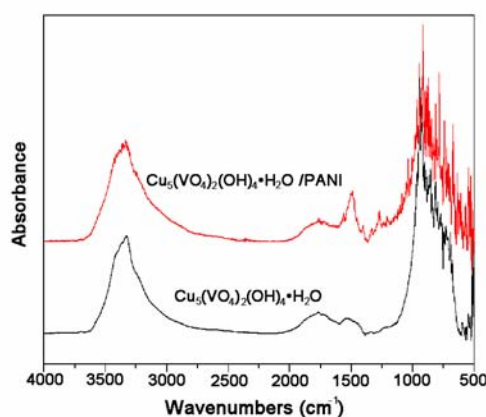

**Figure S1.** The infrared diffuse reflectance spectra of  $\text{Cu}_5(\text{VO}_4)_2(\text{OH})_4 \cdot \text{H}_2\text{O}$  and  $\text{Cu}_5(\text{VO}_4)_2(\text{OH})_4 \cdot \text{H}_2\text{O}/\text{PANI}$  nanorods.

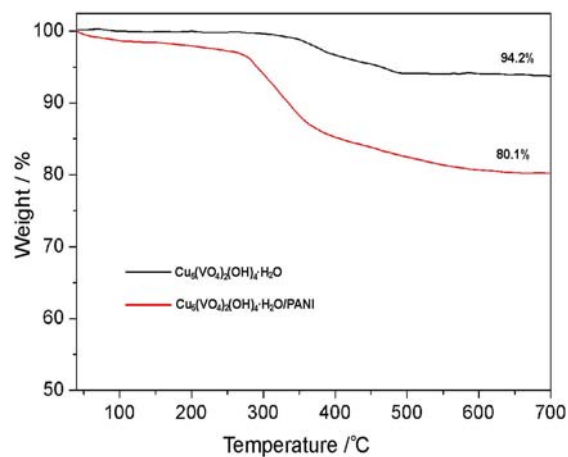

**Figure S2.** Thermal gravimetric analysis (TGA) curves of the  $\text{Cu}_5(\text{VO}_4)_2(\text{OH})_4 \cdot \text{H}_2\text{O}$  and  $\text{Cu}_5(\text{VO}_4)_2(\text{OH})_4 \cdot \text{H}_2\text{O}/\text{PANI}$  composite obtained from 40 to 700 °C at a heating rate of 20 °C/min.

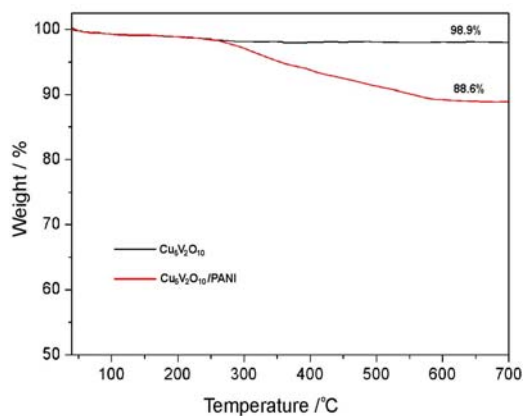

**Figure S3.** TGA curves of the  $\text{Cu}_5\text{V}_2\text{O}_{10}$  and  $\text{Cu}_5\text{V}_2\text{O}_{10}/\text{PANI}$  composite obtained from 40 to 700 °C at a heating rate of 20 °C/min.

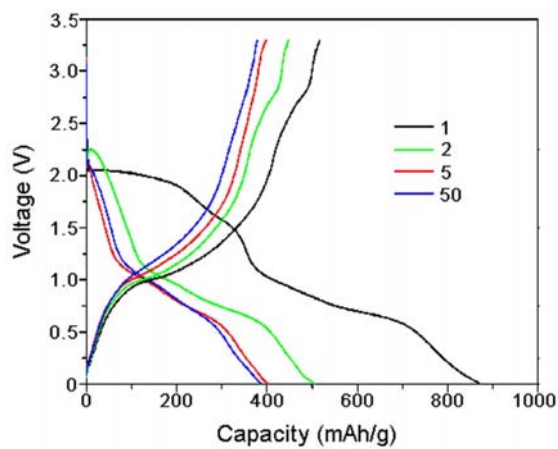

**Figure S4.** The discharge-charge profiles of pure  $\text{Cu}_5(\text{VO}_4)_2(\text{OH})_4 \cdot \text{H}_2\text{O}$  at a current density of 150  $\text{mA g}^{-1}$  between 0.01 V and 3.3 V.

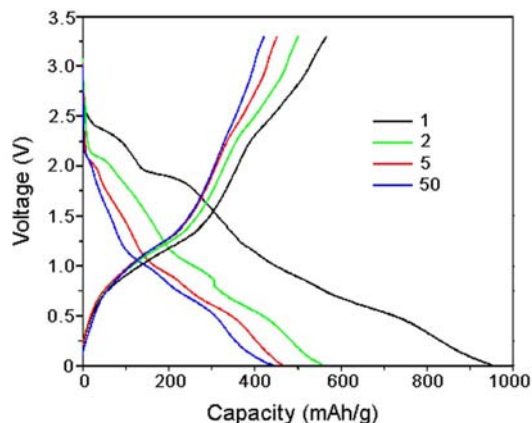

**Figure S5.** The discharge–charge profiles of pure  $\text{Cu}_5\text{V}_2\text{O}_{10}$  at a current density of  $150 \text{ mA g}^{-1}$  between 0.01 V and 3.3 V.

Figure S6 displays the FESEM and TEM images of the electrode mixture removed from the  $\text{Cu}_5(\text{VO}_4)_2(\text{OH})_4 \cdot \text{H}_2\text{O}/\text{PANI}$  electrode after 50 discharge–charge cycles. The FESEM images are not quite clear because of the presence of conductive carbon black and PVDF binder in the electrode mixture; however, the specific rod structure can be identified after 50 discharge–charge cycles, indicating that the primary 1D rodlike morphology of  $\text{Cu}_5(\text{VO}_4)_2(\text{OH})_4 \cdot \text{H}_2\text{O}/\text{PANI}$  nanostructures can still be preserved during the lithium intercalation/deintercalation process, which is of great significance for holding the capacity of the batteries.

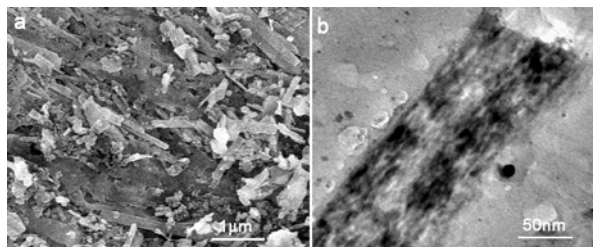

**Figure S6.** FESEM (a) and TEM (b) images of the electrode mixture removed from the  $\text{Cu}_5(\text{VO}_4)_2(\text{OH})_4 \cdot \text{H}_2\text{O}/\text{PANI}$  electrode after 50 discharge–charge cycles.
